# Supplementary material for: Effect of spacers and anchoring groups of extended π-conjugated tetrathiafulvalene based sensitizers on the performance of dye sensitized solar cells
Source: Royal Society of Chemistry journal article supplement (doi:10.1039/c6se00014b), 2017-01-01
Supplement: c6se00014b1.pdf [file c6se00014b1.pdf]

## Electronic Supplementary Information

### Effect of spacer and anchoring group of tetrathiafulvalene based sensitizers influence on the performance of dye sensitized solar cells

Lingamallu Giribabu,<sup>1\*</sup> Naresh Duvva,<sup>1</sup> Seelam Prasanthkumar,<sup>1</sup> Surya Prakash Singh,<sup>1</sup> Liyuan Han,<sup>2</sup>  
Idriss Bedja,<sup>3</sup> Ravindra Kumar Gupta,<sup>3</sup> Ashraful Islam<sup>2\*</sup>

#### Table of Contents

| S.No |                                                                            | Page No. |
|------|----------------------------------------------------------------------------|----------|
| 1    | Fig. S1: <sup>1</sup> H-NMR Spectrum of <b>(2b)</b> in CDCl <sub>3</sub> . | S2       |
| 2    | Fig. S2: <sup>1</sup> H-NMR Spectrum of <b>(2c)</b> in CDCl <sub>3</sub>   | S3       |
| 3    | Fig. S3: <sup>1</sup> H-NMR Spectrum of <b>(G2)</b> in CDCl <sub>3</sub>   | S3       |
| 4    | Fig. S4: <sup>1</sup> H-NMR Spectrum of <b>(G4)</b> in CDCl <sub>3</sub>   | S4       |
| 5    | Fig. S5: <sup>1</sup> H-NMR Spectrum of <b>(G5)</b> in CDCl <sub>3</sub>   | S4       |
| 6    | Fig. S6: <sup>1</sup> H-NMR Spectrum of <b>(G6)</b> in CDCl <sub>3</sub>   | S5       |
| 7    | Fig. S7: <sup>13</sup> C-NMR Spectrum of <b>(2b)</b> in CDCl <sub>3</sub>  | S5       |
| 8    | Fig. S8: <sup>13</sup> C-NMR Spectrum of <b>(2c)</b> in CDCl <sub>3</sub>  | S6       |
| 9    | Fig. S9: <sup>13</sup> C-NMR Spectrum of <b>(G2)</b> in CDCl <sub>3</sub>  | S6       |
| 10   | Fig. S10: <sup>13</sup> C-NMR Spectrum of <b>(G4)</b> in CDCl <sub>3</sub> | S7       |
| 11   | Fig. S11: <sup>13</sup> C-NMR Spectrum of <b>(G5)</b> in CDCl <sub>3</sub> | S7       |
| 12   | Fig. S12: <sup>13</sup> C-NMR Spectrum of <b>(G6)</b> in CDCl <sub>3</sub> | S8       |
| 13   | Fig. S13: MALDI-TOF Spectrum of compound <b>(2b)</b>                       | S8       |
| 14   | Fig. S14: MALDI-TOF Spectrum of compound <b>(2c)</b>                       | S9       |
| 15   | Fig. S15: MALDI-TOF Spectrum of compound <b>(G2)</b>                       | S9       |
| 16   | Fig. S16: MALDI-TOF Spectrum of compound <b>(G4)</b>                       | S10      |
| 17   | Fig. S17: MALDI-TOF Spectrum of compound <b>(G5)</b>                       | S10      |
| 18   | Fig. S18: MALDI-TOF Spectrum of compound <b>(G6)</b>                       | S11      |
| 19   | Fig. S19 HOMO energy of G2.                                                | S11      |
| 20   | Fig. S20: HOMO energy of G4.                                               | S12      |

|    |                                                                                                                                              |     |
|----|----------------------------------------------------------------------------------------------------------------------------------------------|-----|
| 21 | Fig. S21: HOMO energy of G5.                                                                                                                 | S12 |
| 22 | Fig. S22: HOMO energy of G6.                                                                                                                 | S13 |
| 23 | Fig. S23: TG/DTG Curves of G2, G5 and G6 with a heating rate of 10 °C min <sup>-1</sup> under nitrogen atmosphere.                           | S13 |
| 24 | Table S1: The optimized structures, Minimum energy and electrostatic potential (ESP) maps of G2, G4, G5 and G6 dyes                          | S14 |
| 25 | Table S2: Comparison of the experimental optical properties with the theoretical data by B3LYP in dichloromethane of G2, G4, G5 and G6 dyes. | S14 |

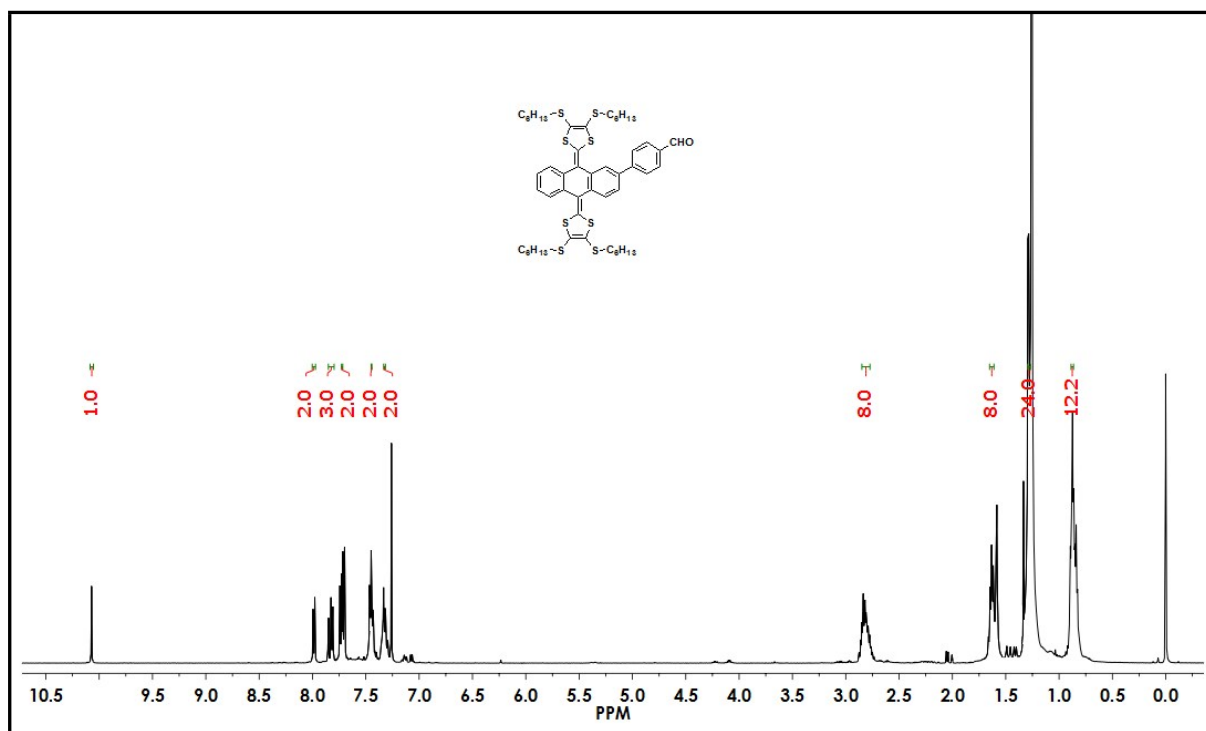

Fig. S1: <sup>1</sup>H NMR Spectrum of (**2b**) in CDCl<sub>3</sub>.

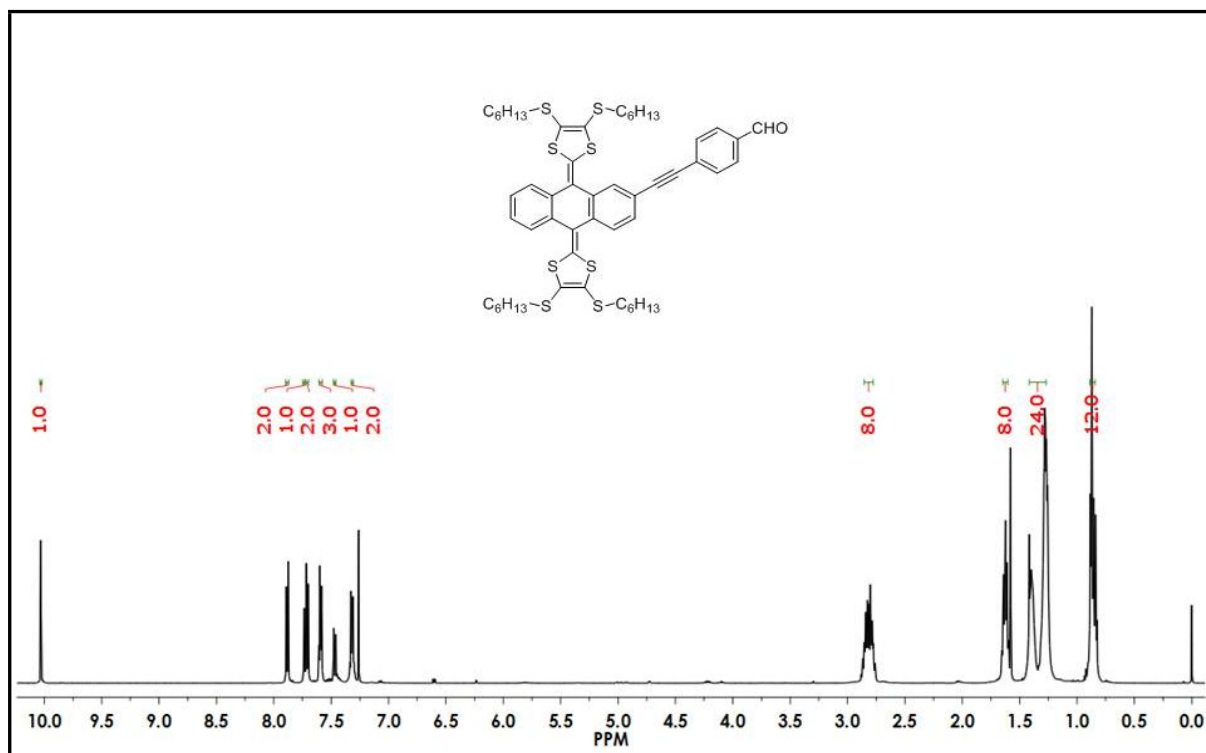

Fig. S2:  $^1\text{H}$ NMR Spectrum of (**2c**) in  $\text{CDCl}_3$

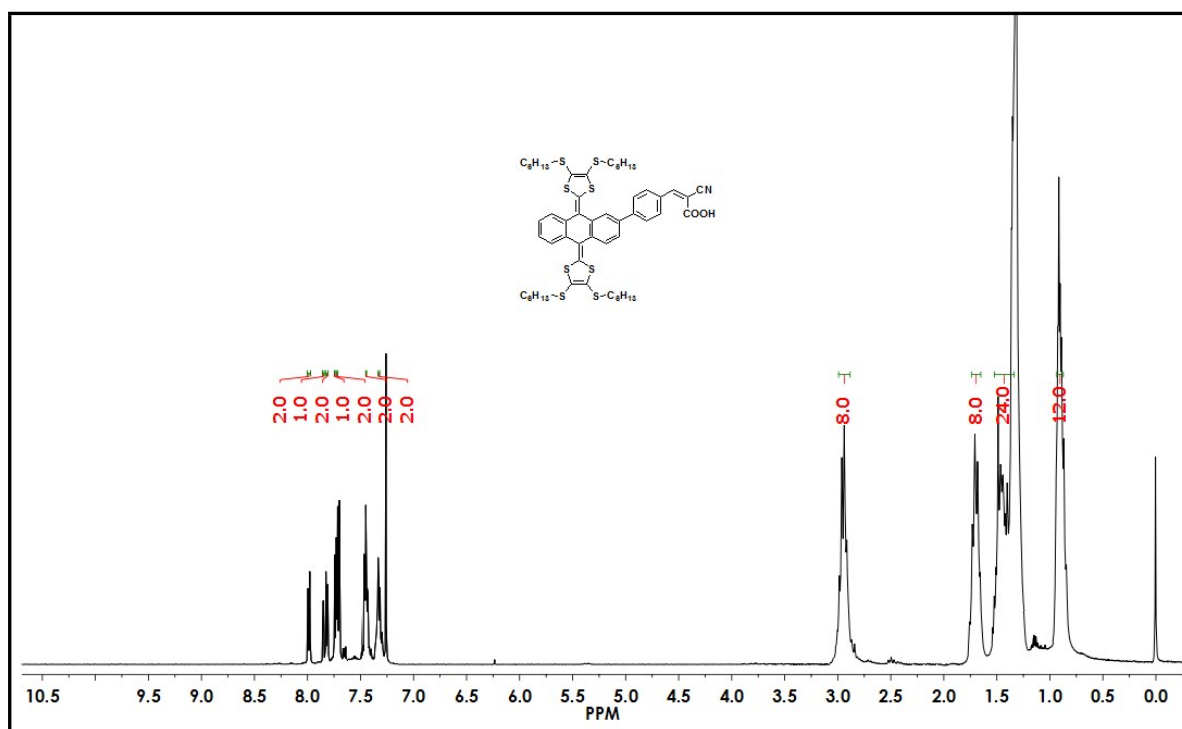

Fig. S3:  $^1\text{H}$ NMR Spectrum of (**G2**) in  $\text{CDCl}_3$

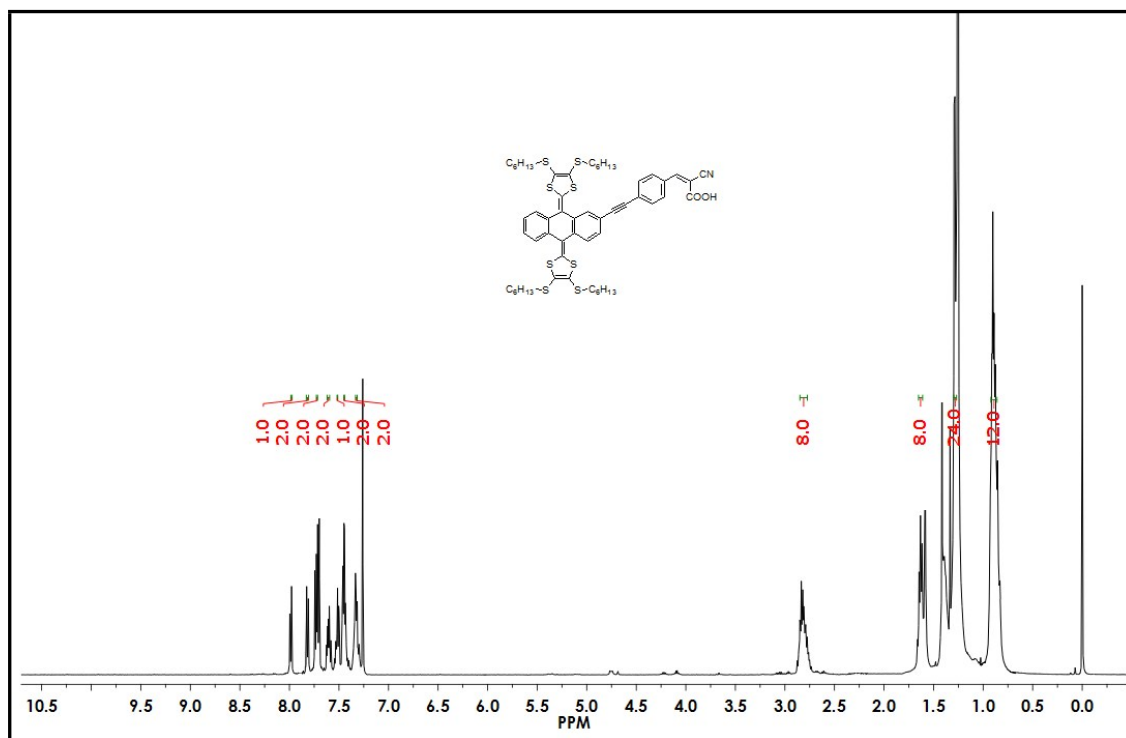

Fig. S4:  $^1\text{H NMR}$  Spectrum of (**G4**) in  $\text{CDCl}_3$

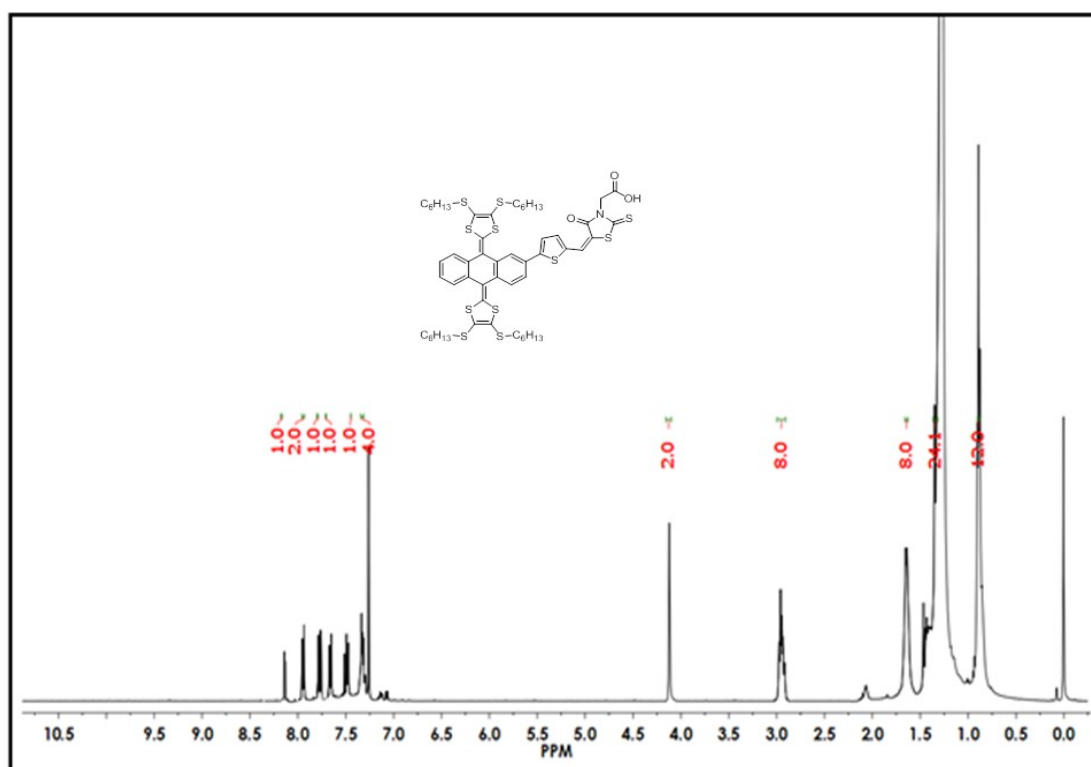

Fig.S5:  $^1\text{H NMR}$  Spectrum of (**G5**) in  $\text{CDCl}_3$



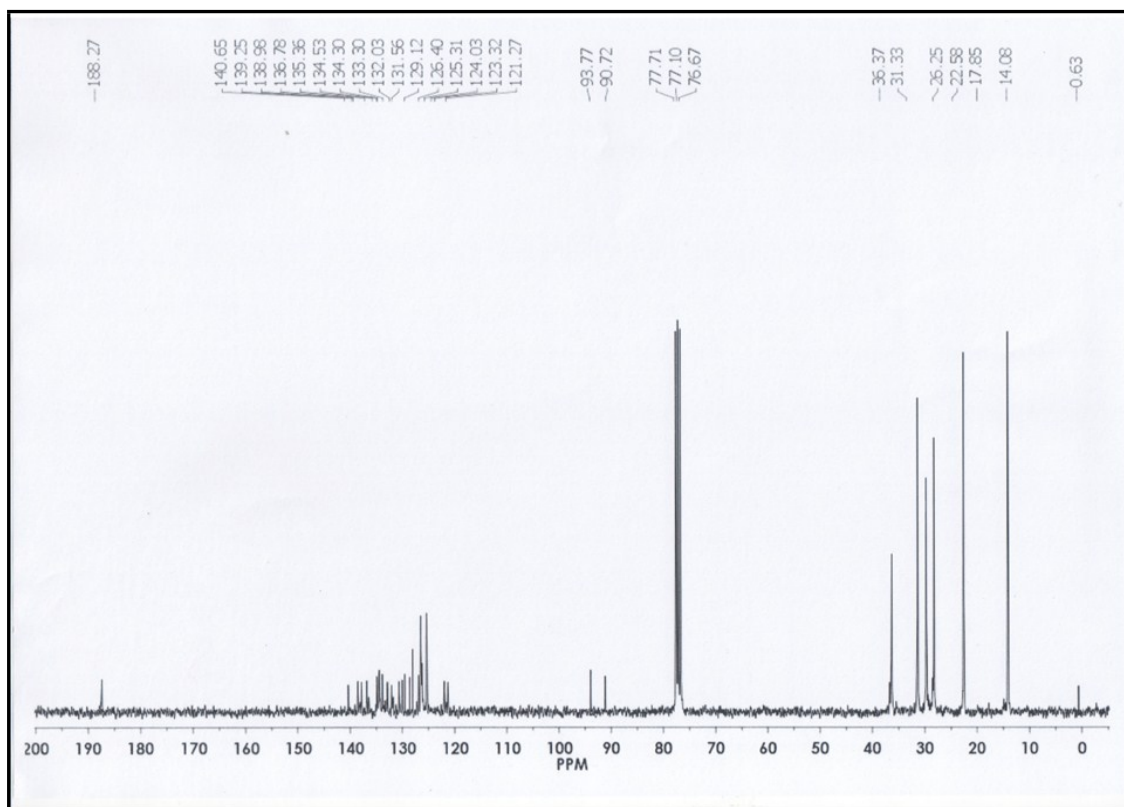

Fig. S8:  $^{13}\text{C}$ -NMR Spectrum of (**2c**) in  $\text{CDCl}_3$

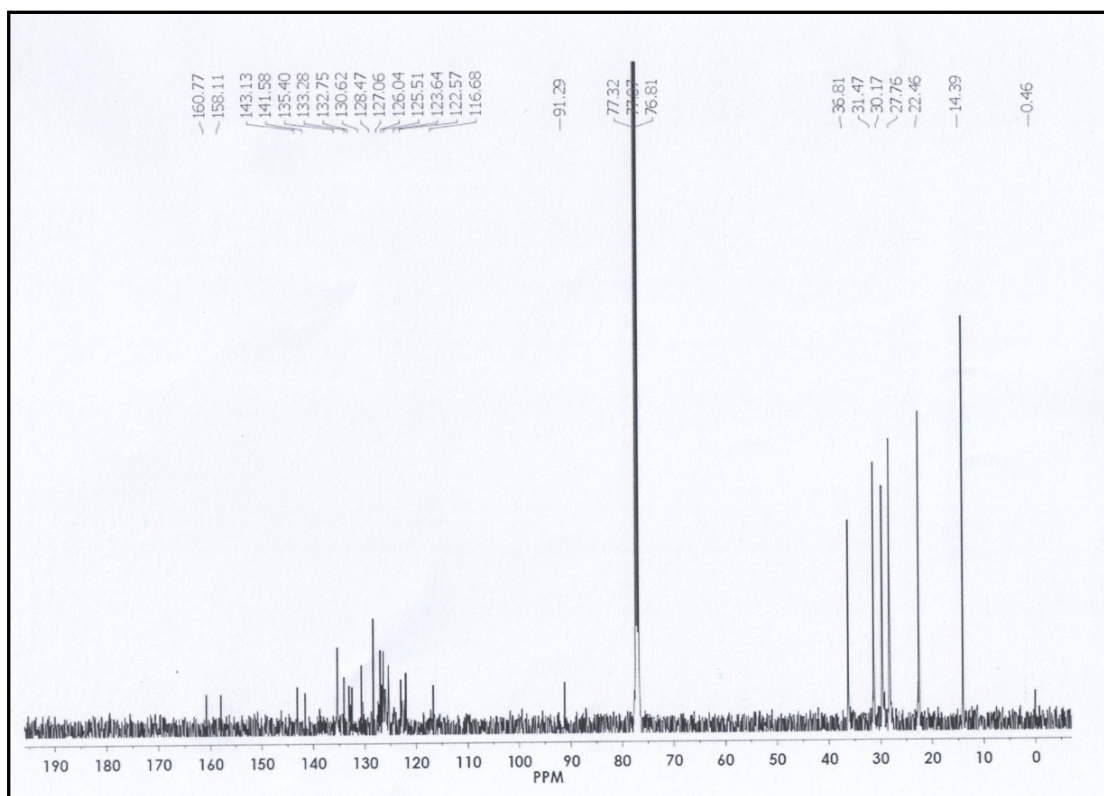

Fig. S9:  $^{13}\text{C}$ -NMR Spectrum of (**G2**) in  $\text{CDCl}_3$



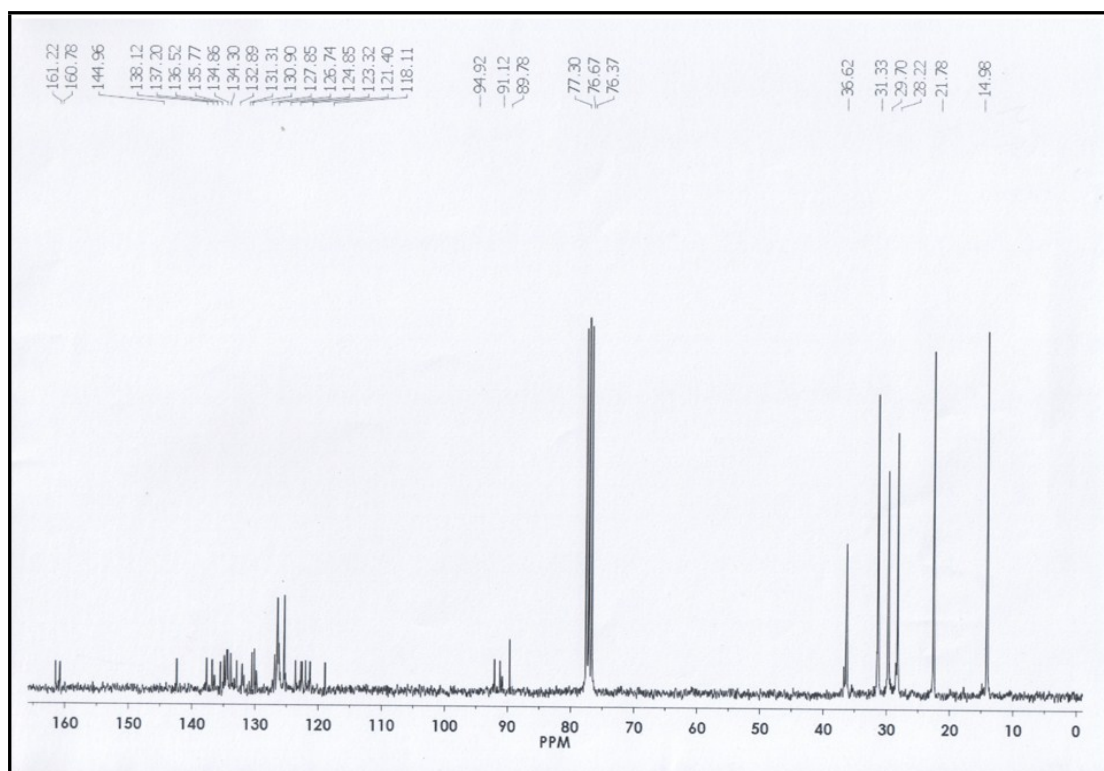

Fig. S10:  $^{13}\text{C}$ -NMR Spectrum of (**G4**) in  $\text{CDCl}_3$

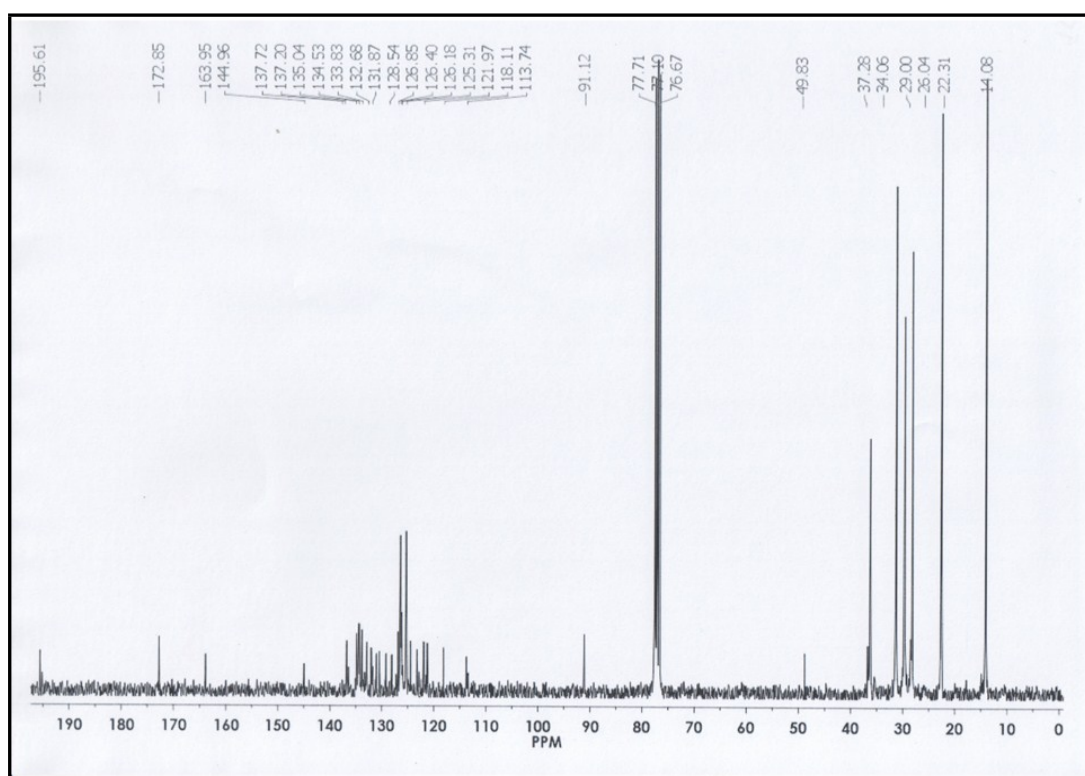

Fig. S11:  $^{13}\text{C}$ -NMR Spectrum of (**G5**) in  $\text{CDCl}_3$

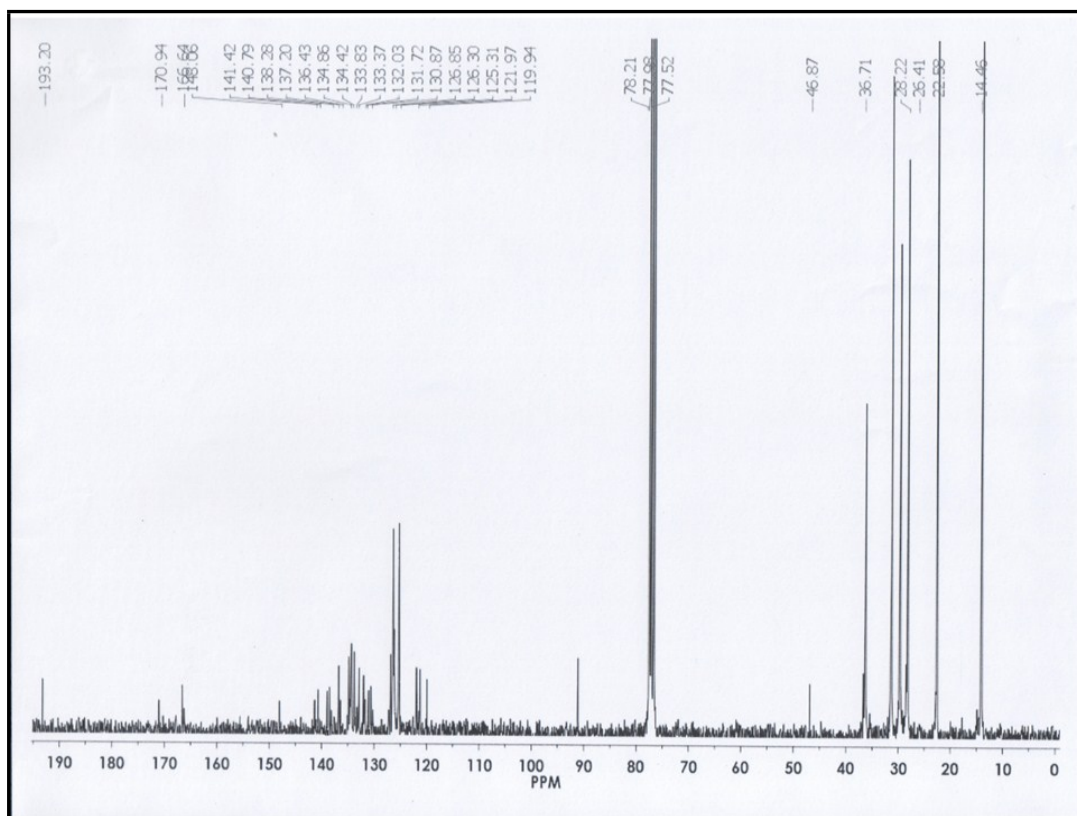

Fig. S12:  $^{13}\text{C}$ -NMR Spectrum of (**G6**) in  $\text{CDCl}_3$

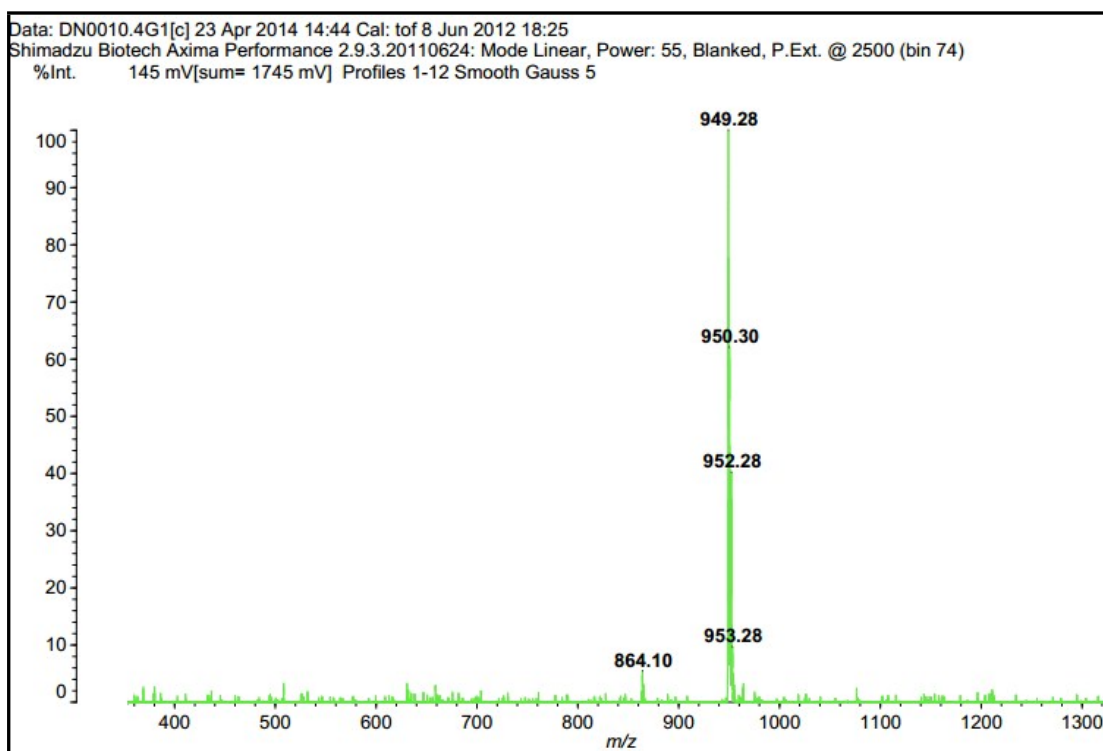

Fig. S13: MALDI-TOF Spectrum of compound (**2b**)



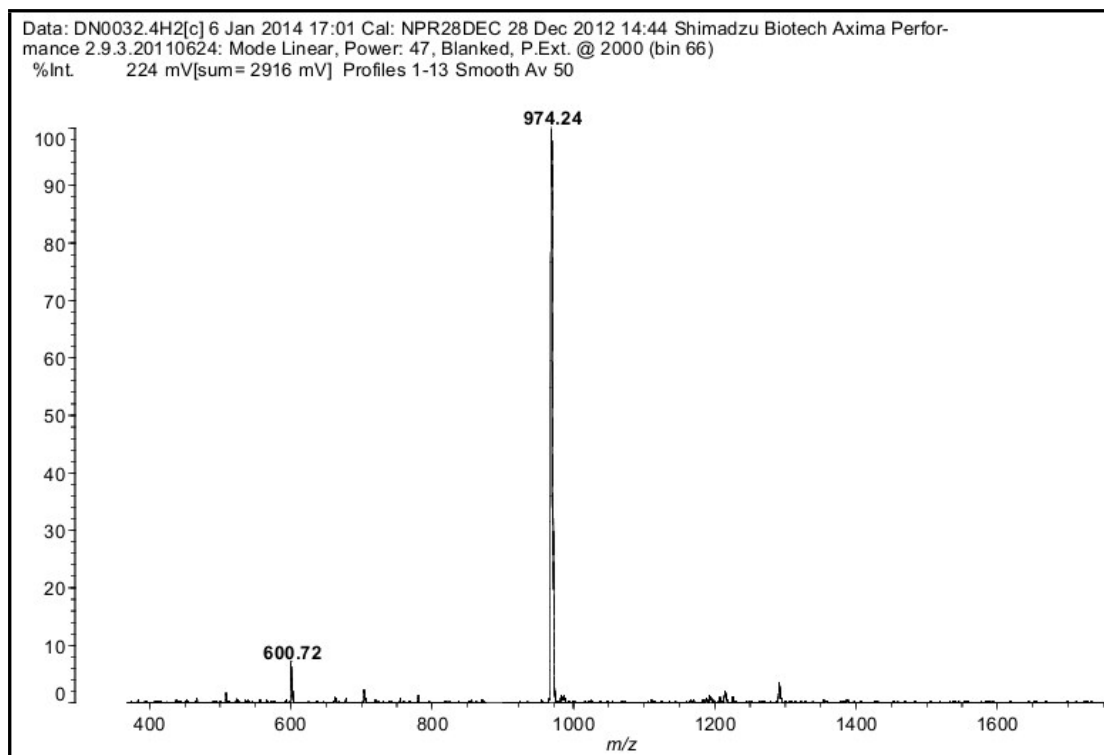

Fig. S14: MALDI-TOF Spectrum of compound (2c)

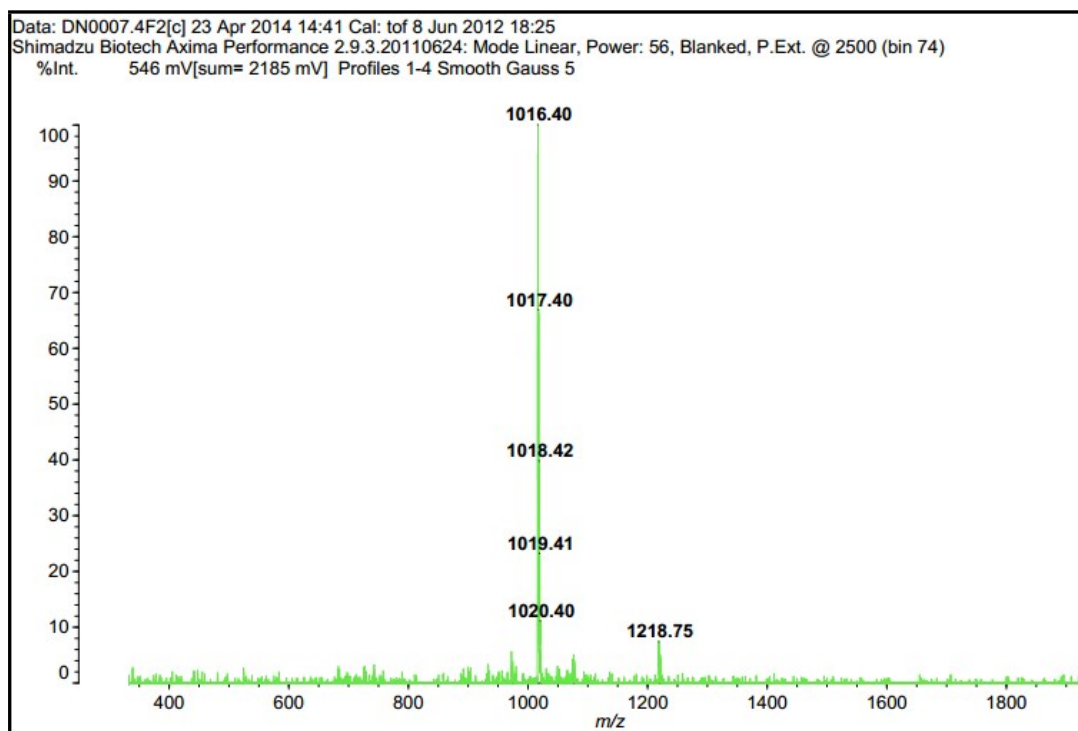

Fig. S15: MALDI-TOF Spectrum of compound (G2)

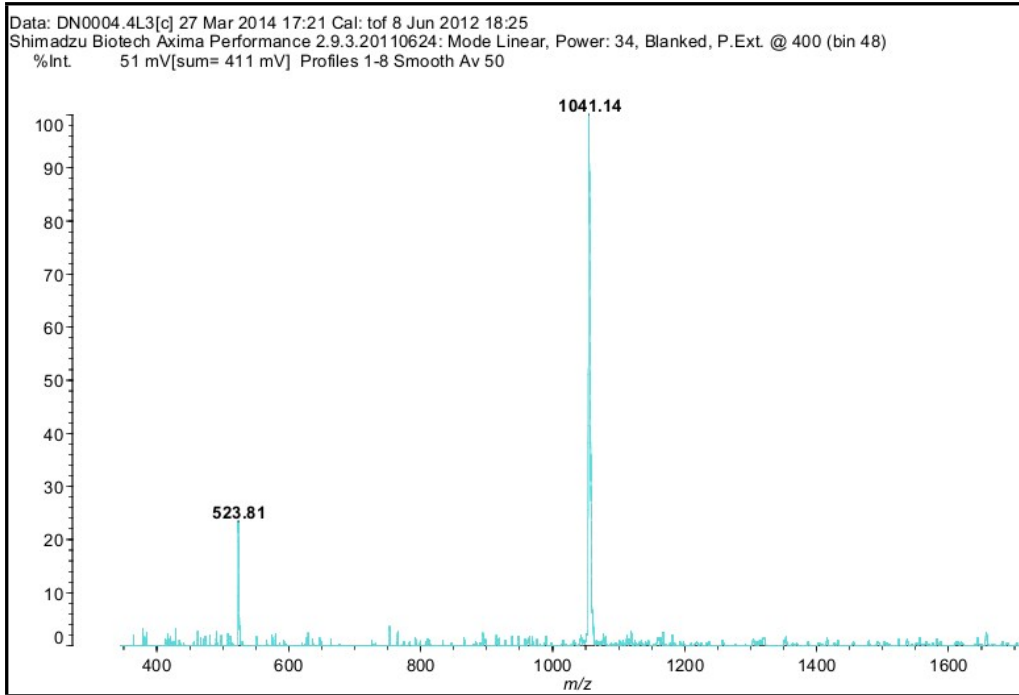

Fig. S16: MALDI-TOF Spectrum of compound (G4)

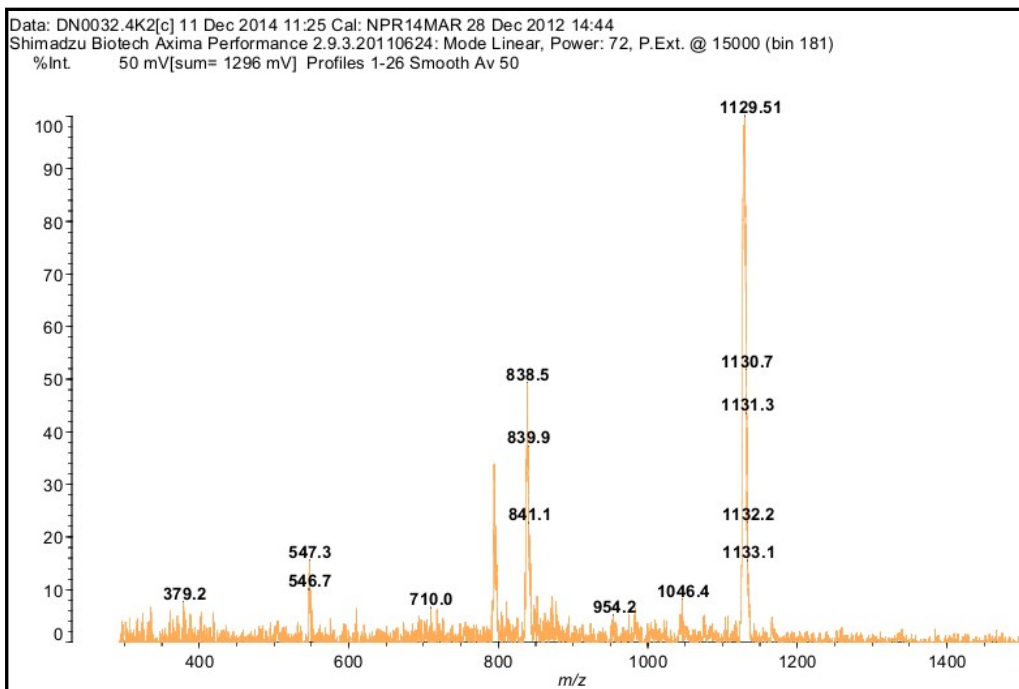

Fig. S17: MALDI-TOF Spectrum of compound (G5)

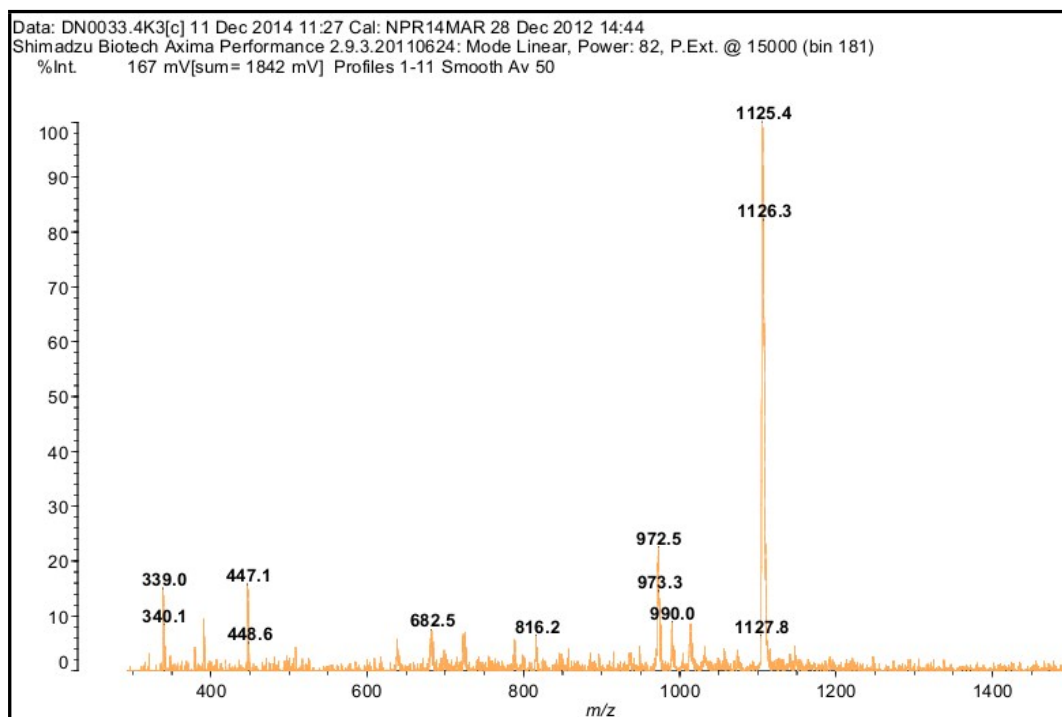

Fig. S18: MALDI-TOF Spectrum of compound (G6)

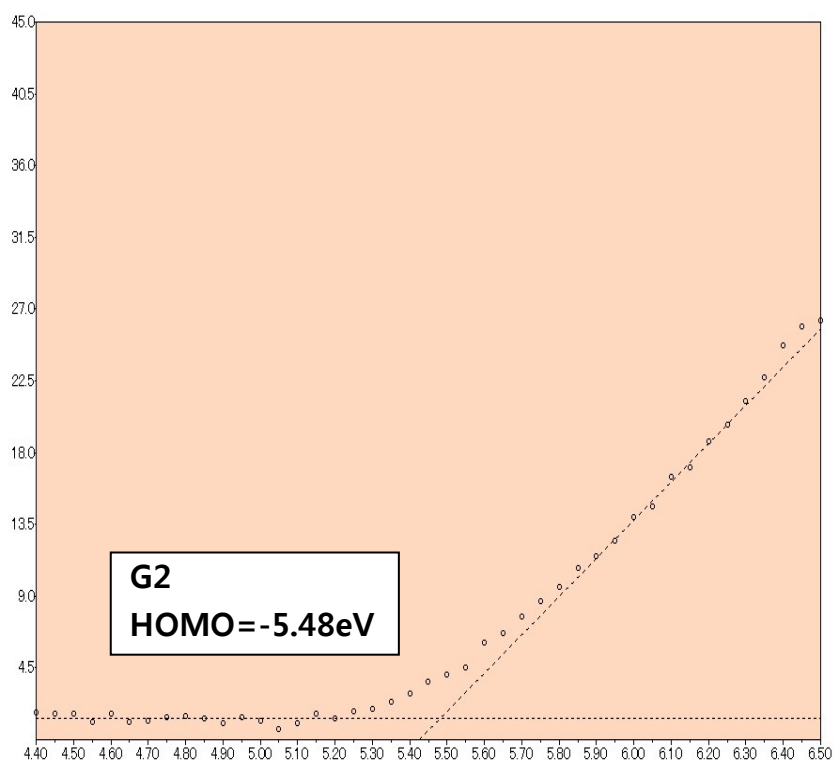

Fig. S19: HOMO energy of G2.

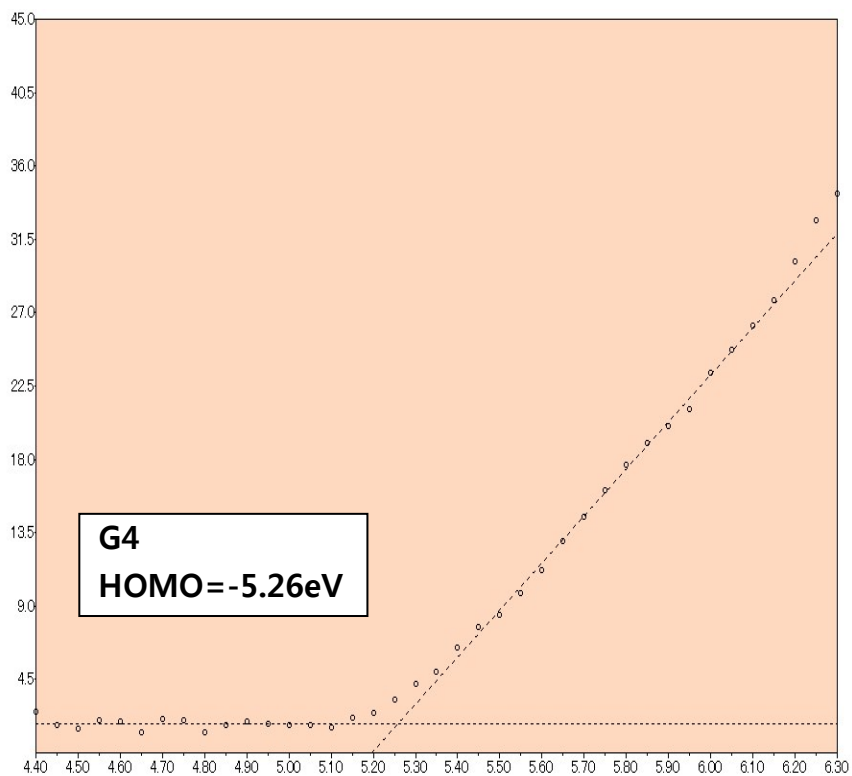

Fig. S20: HOMO energy of G4.

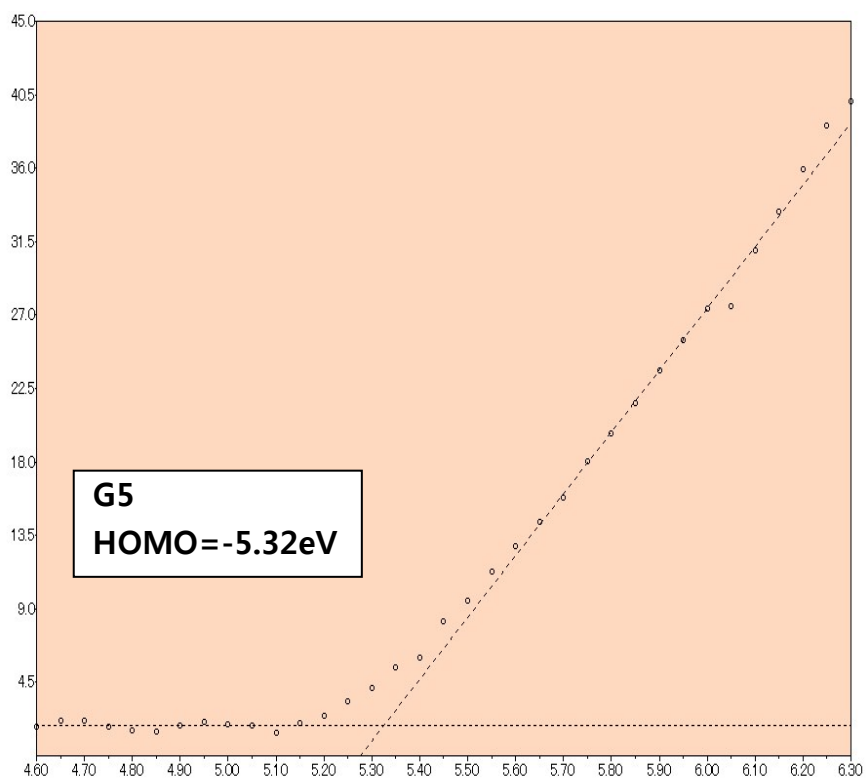

Fig. S21: HOMO energy of G5.

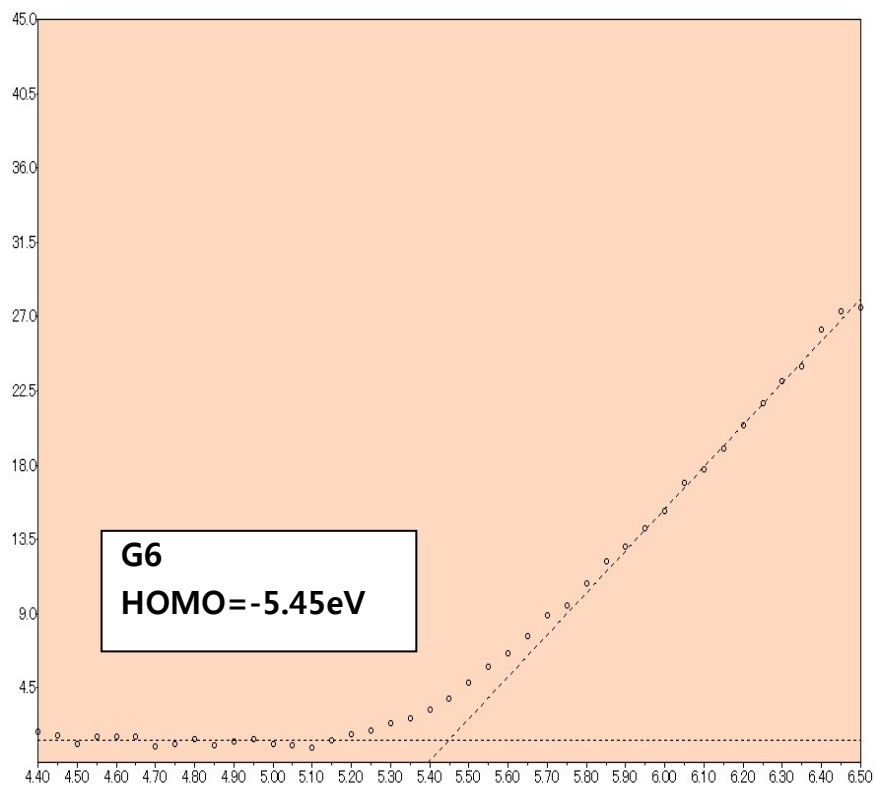

**Fig. S22:** HOMO energy of G6.

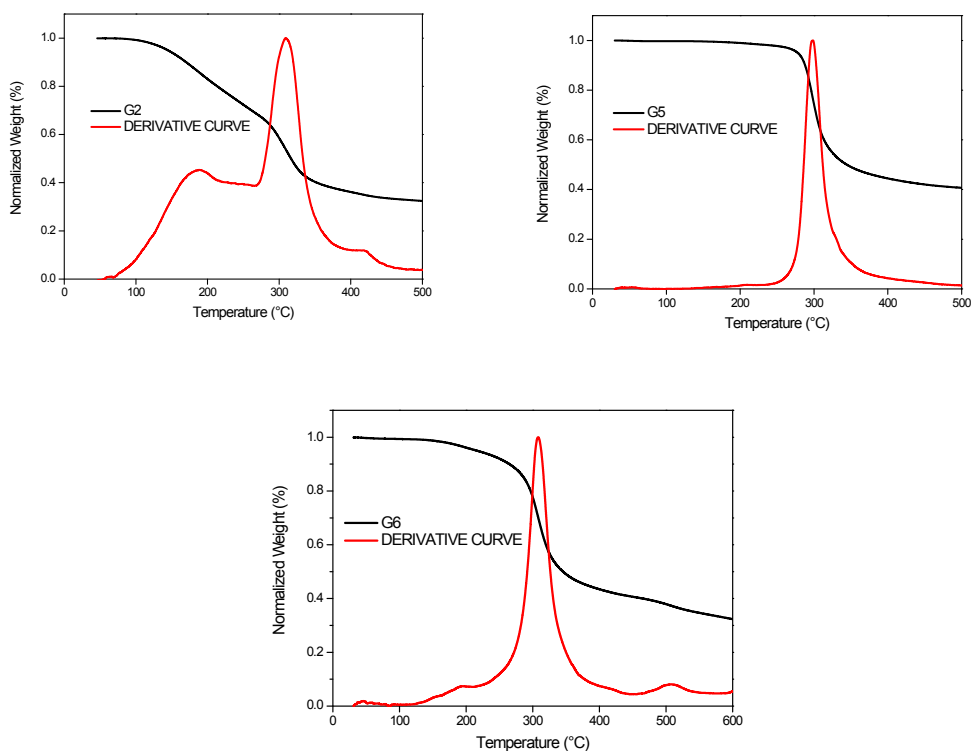

**Fig. S23:** TG/DTG Curves of G2, G5 and G6 with a heating rate of  $10\text{ }^{\circ}\text{C min}^{-1}$  under nitrogen atmosphere.

**Table S1:** The optimized structures, Minimum energy and electrostatic potential (ESP) maps of G2, G4, G5 and G6 dyes.

| Dye                                                  | G2                                                                                                      | G4                                                                                                      | G5                                                                                                       | G6                                                                                                        |
|------------------------------------------------------|---------------------------------------------------------------------------------------------------------|---------------------------------------------------------------------------------------------------------|----------------------------------------------------------------------------------------------------------|-----------------------------------------------------------------------------------------------------------|
| Optimized structure And Minimum energy (in kcal/mol) | 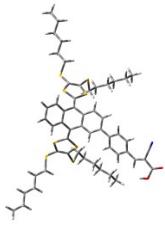<br>$3.44 \times 10^6$ | <br>$3.49 \times 10^6$ | <br>$3.56 \times 10^6$ | <br>$4.03 \times 10^6$ |
| Electrostatic potential (ESP)map                     |                       |                       |                       |                       |

**Table S2:** Comparison of the experimental optical properties with the theoretical data by B3LYP in dichloromethane of G2, G4, G5 and G6 dyes.

| Dye | <sup>a</sup> $\lambda_{\max}$ | <sup>b</sup> $\lambda_{\max}$ | <sup>c</sup> <i>f</i> | <sup>d</sup> E (eV) | % of Molecular Orbital Composition                      |
|-----|-------------------------------|-------------------------------|-----------------------|---------------------|---------------------------------------------------------|
| G 2 | 445                           | 420                           | 0.639                 | 2.94                | HOMO→LUMO (75%), HOMO→L+1 (18%) H-2→LUMO (2%)           |
| G 4 | 455                           | 435                           | 0.925                 | 2.84                | HOMO→LUMO (71%), HOMO→L+1 (19%) H-2→LUMO (5%)           |
| G5  | 440                           | 453                           | 0.989                 | 2.73                | H-2→LUMO (16%), HOMO→LUMO (66%) H-1→LUMO (7%), HOMO→L+1 |
| G 6 | 390                           | 413                           | 0.860                 | 2.99                | HOMO→LUMO (63%), HOMO→L+1 (23%) H-2→LUMO (9%)           |

<sup>a</sup>Recorded absorbance in nm, <sup>b</sup> theoretical absorbance in nm, <sup>c</sup> Oscillation strength, and <sup>d</sup> excited state energy in eV.
